# **Efficient culture of SARS-CoV-2 in human hepatoma cells enhances viability of the virus in human lung cancer cell lines permitting the screening of antiviral compounds**

Santseharay Ramirez<sup>a#</sup>, Carlota Fernandez-Antunez<sup>a</sup>, Long V. Pham<sup>a</sup>, Line A. Ryberg<sup>a</sup>, Shan Feng<sup>a</sup>, Martin S. Pedersen<sup>a,b</sup>, Lotte S. Mikkelsen<sup>a</sup>, Sandrine Belouzard<sup>c</sup>, Jean Dubuisson<sup>c</sup>, Judith M. Gottwein<sup>a</sup>, Ulrik Fahnøe<sup>a</sup> and Jens Bukh<sup>a,#</sup>

<sup>a</sup>Copenhagen Hepatitis C Program (CO-HEP), Department of Infectious Diseases, Hvidovre Hospital and Department of Immunology and Microbiology, Faculty of Health and Medical Sciences, University of Copenhagen, Denmark.

<sup>b</sup>Department of Clinical Microbiology, Hvidovre Hospital, Hvidovre, Denmark.

<sup>c</sup>University of Lille, CNRS, Inserm, CHU Lille and Centre d'Infection et d'Immunité de Lille, Institut Pasteur de Lille, France.

Running Head: Efficient SARS-CoV-2 culture in human cell lines

#Address correspondence to Santseharay Ramirez, [santseharayra@sund.ku.dk](mailto:santseharayra@sund.ku.dk) and Jens Bukh, [jbukh@sund.ku.dk](mailto:jbukh@sund.ku.dk).

Word counts: Abstract, 250 words, Importance, 150 words, Main text, 5292 words (does not include references, figure legends and table notes)

## 22 Abstract

23 Efforts to mitigate COVID-19 include screening of existing antiviral molecules that could be re-  
 24 purposed to treat SARS-CoV-2 infections. Although SARS-CoV-2 propagates efficiently in African  
 25 green monkey kidney (Vero) cells, antivirals such as nucleos(t)ide analogs (nucs) often exhibit  
 26 decreased activity in these cells due to inefficient metabolization. Limited SARS-CoV-2 replication  
 27 and propagation occurs in human cells, which are the most relevant testing platforms. By performing  
 28 serial passages of a SARS-CoV-2 isolate in the human hepatoma cell line clone Huh7.5, we selected  
 29 viral populations with improved viability in human cells. Culture adaptation led to the emergence of a  
 30 significant number of high frequency changes (>90% of the viral population) in the region coding for  
 31 the spike glycoprotein, including a deletion of nine amino acids in the N-terminal domain and 3 amino  
 32 acid changes (E484D, P812R, and Q954H). We demonstrated that the Huh7.5-adapted virus exhibited  
 33 a >3-Log<sub>10</sub> increase in infectivity titers (TCID<sub>50</sub>) in Huh7.5 cells, with titers of ~8 Log<sub>10</sub>TCID<sub>50</sub>/mL,  
 34 and >2-Log<sub>10</sub> increase in the human lung cancer cell line Calu-1, with titers of ~6 Log<sub>10</sub>TCID<sub>50</sub>/mL.  
 35 Culture adaptation in Huh7.5 cells further permitted efficient infection of the otherwise SARS-CoV-2  
 36 refractory human lung cancer cell line A549, with titers of ~6 Log<sub>10</sub>TCID<sub>50</sub>/mL. The enhanced ability  
 37 of the virus to replicate and propagate in human cells permitted screening of a panel of nine nucs,  
 38 including broad-spectrum compounds. Remdesivir, EIDD-2801 and to a limited extent galidesivir  
 39 showed antiviral effect across these human cell lines, whereas sofosbuvir, uprifosbuvir, valopicitabine,  
 40 mericitabine, ribavirin, and favipiravir had no apparent activity.

# **Importance**

The cell culture adapted variant of the SARS-CoV-2 virus obtained in the present study, showed significantly enhanced replication and propagation in various human cell lines, including lung derived cells otherwise refractory for infection with the original virus. This SARS-CoV-2 variant will be a valuable tool permitting investigations across human cell types, and studies of identified mutations could contribute to our understanding of viral pathogenesis. In particular, the adapted virus can be a good model for investigations of viral entry and cell tropism for SARS-CoV-2, in which the spike glycoprotein plays a central role. Further, as shown here with the use of remdesivir and EIDD-2801, two nucs with significant inhibitory effect against SARS-CoV-2, large differences in the antiviral activity are observed depending on the cell line. Thus, it is essential to select the most relevant target cells for pre-clinical screenings of antiviral compounds, facilitated by using a virus with broader tropism.

## 53 **Introduction**

54 The Severe Acute Respiratory Syndrome Coronavirus 2 (SARS-CoV-2), responsible for COVID-19,  
 55 was first identified in China in early 2020<sup>1</sup>, but has reached pandemic proportions with over 29 million  
 56 people infected worldwide by September of 2020<sup>2</sup>. Although a hallmark of COVID-19 is the  
 57 development of various levels of lung affection from mild upper airway symptoms to life-threatening  
 58 pneumonia, additional distinctive features of the disease are vascular changes<sup>3</sup> and numerous  
 59 extrapulmonary manifestations and systemic complications<sup>4</sup>.

60 The SARS-CoV-2 virus has been classified within the *Coronaviridae* family, *Betacoronavirus* genus  
 61 and *Sarbecovirus* subgenus<sup>5</sup>. It is most closely related to SARS-like betacoronavirus of bat origin, but  
 62 its genomic organization is very similar to the well-characterized SARS-CoV<sup>1</sup>. Its genome consists of a  
 63 long positive sense, single strand RNA molecule of approximately 30 kb, following the classical  
 64 genomic organization of viruses belonging to this family, with untranslated regions (UTR) at the 5' and  
 65 3' ends and numerous open reading frames (ORF) throughout the coding sequences<sup>1</sup>. Separate ORFs  
 66 encode the structural components, including the spike glycoprotein (S), the envelope (E), the  
 67 membrane (M), and the nucleocapsid (N), as well as various accessory proteins<sup>1</sup>. The largest ORFs (1a  
 68 and 1ab) encode the nonstructural proteins of the virus (nsp), responsible for the RNA synthesis  
 69 machinery<sup>1</sup>. The viral RNA dependent RNA polymerase (nsp12) is an attractive drug target for  
 70 antiviral therapy. However, identifying nucleos(t)ide analogs (nucs) with anti-coronavirus activity is  
 71 challenged by the viral nsp14 protein, which has 3' to 5' proofreading exonuclease capacity, and  
 72 only a very limited number of molecules have been shown to overcome this activity<sup>6</sup>.

Drug repurposing, compared to de-novo drug discovery, significantly shortens the time and reduces the cost of developing antivirals for emerging pandemic viral diseases. Two of the antiviral molecules that inhibit SARS-CoV-2 and other pandemic coronaviruses are broad-spectrum antivirals remdesivir and  $\beta$ -d-N4-hydroxycytidine (NHC), which were initially part of antiviral discovery programs for the treatment of hepatitis C virus (HCV) infections<sup>7,8</sup>. Remdesivir is now included in standard of care treatment of COVID-19 patients in several countries. It is therefore relevant to continue searching for such compounds, focusing on the molecules that exhibit a good safety profile in humans and developing appropriate models for their pre-clinical screening in cell culture.

SARS-CoV-2 infects the epithelial cells in the upper respiratory tract and in the lungs in humans, however, established cell lines differ in their support for SARS-CoV-2 viral production<sup>9</sup>. Various clones of the African green monkey kidney cell line “Vero” support the highest levels of SARS-CoV-2 replication and propagation, however, not being a human cell line Vero cells show limitations for drug screening, especially for screening of prodrugs that have been designed to be metabolized in human cells<sup>10</sup>. Calu-3, a non-small-cell lung cancer cell line<sup>11</sup>, supports SARS-CoV-2 infection and replication with viral particle production, but at lower levels than those observed in Vero cells<sup>10,12</sup>. Other viruses, such as HCV, also exhibit restricted culture viability, and efficient replication and propagation of HCV is limited to specific clones derived from the human hepatoma cell line (Huh7), including Huh7.5<sup>13,14</sup>.

In this study, we aimed at establishing more efficient and robust platforms for the culture of SARS-CoV-2 in human cells through viral adaptation, permitting basic studies of the virus, including the screening of antiviral compounds, in relevant cell lines.

## Results

**Characterization of a COVID-19 associated SARS-CoV-2 isolate (SARS-CoV-2/human/Denmark/ DK-AHH1/2020) in Vero E6 cells.** Vero cells, which permit the isolation of SARS-CoV-2 with high efficiency, were used to obtain the initial virus stock. Vero E6 cells were inoculated with a diluted nasopharyngeal sample from a COVID-19 patient diagnosed with SARS-CoV-2 infection. On day 3 after inoculation, cell cytopathic effect (CPE) was observed, which peaked at day 7. At first, CPE was characterized by the presence of syncytia, followed by the appearance of moderate cell death. Severe CPE with significant cell death was not observed until days 6-7. Culture supernatants were harvested daily during the first 5 days of the experiment and the infectivity titers (expressed as tissue culture infectious dose 50% per milliliter ( $\text{Log}_{10}\text{TCID}_{50}/\text{mL}$ )) were determined using Vero E6 cells and were found to peak at day 4 at  $6.4 \text{ Log}_{10}\text{TCID}_{50}/\text{mL}$ .

The culture supernatant harvested at day 2 post-inoculation was used to perform a first passage infection of naïve Vero E6 cells at a multiplicity of infection (MOI) of 0.02. After passage to naïve cells, CPE was observed at day 2. Two independent second passages were performed using the culture supernatants harvested at days 2 and 3, respectively. CPE was observed promptly after infection, and a large volume of supernatant was harvested at days 2 and 3 from both independent experiments. These supernatants were combined to generate a stock virus (referred to as  $\text{P2}^{\text{VeroE6}}$ ) that was further characterized and used for the additional experiments described below. The infectivity titer of the  $\text{P2}^{\text{VeroE6}}$  virus stock was  $5.5 \text{ Log}_{10}\text{TCID}_{50}/\text{mL}$ .

We determined the complete SARS-CoV-2 genome sequence (including the 5' and 3' UTRs) of the original patient virus and of the  $\text{P2}^{\text{VeroE6}}$  virus as described in Materials and Methods. As shown in

114 Table 1, the isolate SARS-CoV-2/human/Denmark/DK-AHH1/2020, referred to as SARS-CoV-2\_DK-  
 115 AHH1 hereinafter, exhibits only 10 nucleotide differences when compared to the reference sequence of  
 116 the Wuhan-Hu-1 isolate (genbank NC045512.2). Among these, 6 differences lead to amino acid  
 117 changes in the nsp2, nsp12, S, ORF3a, and N genomic regions. SARS-CoV-2\_DK-AHH1 harbors the  
 118 high frequency polymorphisms D614G in S, which is now dominant throughout the world and has been  
 119 linked to increased infectivity in pseudo-typed virus assays in cell culture<sup>15</sup>, and P323L in nsp12, which  
 120 has not yet been linked to any phenotype. Compared to the original clinical sample, the virus recovered  
 121 after 2 passages in Vero E6 cells (P2<sup>VeroE6</sup>) was remarkably similar, with only one new change  
 122 emerging in a small subset of the viral population (C71T in the 5'UTR). Additionally, G22487A  
 123 (amino acid change E309K in the S-protein), which was the only consensus difference between isolate  
 124 DK-AHH1 and the reference sequence Wuhan-Hu-1 not fixed (frequency under 99%) in the viral  
 125 population, further decreased in frequency after passage in Vero E6 cells from 81.8% to 56.9% (Table  
 126 1).

127 **SARS-CoV-2 can be adapted to efficient growth in human hepatoma cells (cell clone Huh7.5).** We  
 128 performed inoculations of Huh7.5 cells with the P2<sup>VeroE6</sup> virus to determine the susceptibility and  
 129 permissiveness of this cell line. The virus supernatant derived from this first passage was used to  
 130 inoculate naïve Huh7.5 cells to perform the next passage and successively until passage 6 (Figure 1a).  
 131 We observed that the emergence of CPE occurred earlier and was more evident as the passage number  
 132 increased, suggesting viral adaptation. In passage 1 in Huh7.5 cells, CPE was not observed until day 8  
 133 post-infection, and the magnitude of the CPE was low at this time, with only minor changes in the  
 134 morphology of the cells, in contrast to the CPE observed in the passage 6 culture, which displayed  
 135 massive cell death by day 4 post-infection. The 5<sup>th</sup> passage in Huh7.5 was performed in big cell flasks,

in order to generate a large volume of supernatant that could be used for characterization of the Huh7.5 adapted virus (this virus will be referred to as P5<sup>Huh7.5</sup> virus).

We performed a comparative titration in various cells of the P2<sup>VeroE6</sup> and the P5<sup>Huh7.5</sup> viruses (Figure 1b) and found that the infectivity titers in Huh7.5 cells after culture adaptation had increased by more than 3 logs (mean of 4.7 and 8.0 Log<sub>10</sub>TCID<sub>50</sub>/mL, respectively). The Huh7.5 adapted virus also exhibited significantly increased titers in Vero E6 cells (mean of 7.0 Log<sub>10</sub>TCID<sub>50</sub>/mL for the P5<sup>Huh7.5</sup> virus versus 5.5 Log<sub>10</sub>TCID<sub>50</sub>/mL for the P2<sup>VeroE6</sup> virus). Interestingly, the original P2<sup>VeroE6</sup> virus was less viable in the Huh7 parental cell line than in the Huh7.5 clone, however, adaptation to the Huh7.5 clone also led to a significant increase in infectivity titers in Huh7 cells (3.8 and 7.7 Log<sub>10</sub>TCID<sub>50</sub>/mL for the P2<sup>VeroE6</sup> and P5<sup>Huh7.5</sup> viruses, respectively).

Visual observations of P5<sup>Huh7.5</sup> virus infected cultures in the light microscope indicated an increase in CPE. To better quantify this, we performed viral cytopathic effect assays (CPE assays, Figure 1c), in which we detected an evident increase in CPE titers (Log<sub>10</sub>CPE<sub>50</sub>/mL) in all cells. CPE significantly increased from 4.6 to 6.2 Log<sub>10</sub>CPE<sub>50</sub>/mL in Vero E6 cells. In Huh7.5 cells, the P2<sup>VeroE6</sup> virus was not cytopathic (we obtained a value just above the assay threshold in one of the independent experiments), whereas the P5<sup>Huh7.5</sup> virus led to high titers of 7.3 Log<sub>10</sub>CPE<sub>50</sub>/mL. For the Huh7 parental cells the P2<sup>VeroE6</sup> virus was also non-cytopathic, but the adapted P5<sup>Huh7.5</sup> yielded 6.1 Log<sub>10</sub>CPE<sub>50</sub>/mL.

In addition to the increase in infectivity titers observed after infection with the adapted P5<sup>Huh7.5</sup> virus in Huh7.5 cells, we also noticed an evident increase in the intensity of the antigen staining ( $\alpha$ -spike protein antibody), and in the number of infected cells at non-cytopathic virus dilutions of the P5<sup>Huh7.5</sup> virus compared to the P2<sup>VeroE6</sup> virus (Figure 1d). This suggest that the P5<sup>Huh7.5</sup> virus might both



replicate and propagate at higher levels in Huh7.5 cells, as also indicated by the significant increase in CPE titers. In contrast, no such evident differences were observed upon infection of Vero E6 cells with the adapted virus despite the increase in infectivity titers (data not shown).

The near complete genome sequence of the Huh7.5 adapted viruses (P1, P5 and P6) was obtained and analyzed. We found mutations leading to amino acid changes in several nonstructural and structural proteins compared to P2<sup>VeroE6</sup> (Table 2). The region coding for the spike protein accumulated a significant number of high frequency (>90% of the viral population) changes, including a deletion leading to the removal of nine amino acids in the N-terminal domain (from nt. 21762 to nt. 21788) and 3 non-synonymous mutations: A23014C (E484D aa change according to S-protein specific numbering), C23997G (P812R), and A24424C (Q954H). The deletion and the E484D substitution were already dominant (frequency >90%) after the first passage in Huh7.5 cells (P1<sup>Huh7.5</sup>, Table 2).

Outside S, the only other positions in which we found clear indication of evolution at the amino acid level (that is sustained increase in frequency of a residue over the three analyzed Huh7.5 passages) were T11522G (F184V according to nsp6 specific protein number), C19895T (A92V according to nsp15 specific protein number), C26333T (T30I according to E specific protein number), and C28331T (P20S according to N specific protein number) (Table 2).

**Adaptation of SARS-CoV-2 to efficient growth in human hepatoma cells (Huh7.5) leads to robust culture in Calu-1 and A549 lung carcinoma cells.** We reasoned that the Huh7.5-adapted viruses might facilitate culture in other human cell lines, including respiratory tract cell lines that would be the most relevant infection model for culture studies. So far, only the Calu-3 cell line has been shown to support, to a limited extent, SARS-CoV-2 productive infections, however, the A549 cell line is

178 refractory to infection<sup>12,16</sup>. To our knowledge, the ability of the Calu-1 cell line to support SARS-CoV-  
179 2 replication and propagation has not been previously reported. The Calu-1 and the A549 cell lines are  
180 widely available and well-characterized standards among the human lung carcinoma/alveolar cell lines  
181 used in cancer research<sup>17,18</sup>. Further, the A549 cell line is also a model for the study of respiratory  
182 viruses, such as respiratory syncytial virus and influenza<sup>19,20</sup>.

183 Compared to the P2<sup>VeroE6</sup> virus, the P5<sup>Huh7.5</sup> virus exhibited a significant increase in the ability to infect  
184 Calu-1 cells with >2-log increase in infectivity titers. For the original P2<sup>VeroE6</sup> virus, observed titers in  
185 Calu-1 were 3.5 Log<sub>10</sub>TCID<sub>50</sub>/mL, which increased to 6.0 Log<sub>10</sub>TCID<sub>50</sub>/mL for the P5<sup>Huh7.5</sup> virus  
186 (Figure 2a). Surprisingly, the P5<sup>Huh7.5</sup> virus was able to efficiently infect A549 cells, with titers of 6.0  
187 Log<sub>10</sub>TCID<sub>50</sub>/mL; the A549 cells could not be infected with the P2<sup>VeroE6</sup> virus (Figure 2a). Albeit at  
188 lower levels than in Huh7.5, we could also detect CPE in Calu-1 and A549 cells infected with the  
189 P5<sup>Huh7.5</sup> virus, for which no CPE was observed with the original virus (Figure 2b), indicating enhanced  
190 replication.

191 In addition to the increase in infectivity and CPE titers observed after infection of the Calu-1 and A549  
192 cells with the P5<sup>Huh7.5</sup> compared to the P2<sup>VeroE6</sup> virus, we also detected an increment in the intensity of  
193 the antigen staining ( $\alpha$ -spike protein antibody) and in the number of infected cells upon inoculation  
194 with the same dilution of these viruses (Figure 2c). Thus, and in accordance with our observations in  
195 Huh7.5 cells, both better replication and propagation was achieved with the P5<sup>Huh7.5</sup> virus.

196 **Improved activity of remdesivir against SARS-CoV-2 in human Huh7.5 cells.** Remdesivir was  
197 previously reported to inhibit SARS-CoV-2 in Vero<sup>21-23</sup> and human lung cells (Calu-3)<sup>10</sup>. Here, we  
198 found EC<sub>50</sub> values of 1.5  $\mu$ M in the concentration-response assays with the P2<sup>VeroE6</sup> virus in Vero E6

cells (Figure 3a). Further we demonstrated that this drug displayed ~50-fold higher activity against the same virus (P2<sup>VeroE6</sup>) in Huh7.5 cells (EC<sub>50</sub> of 0.03 μM, Figure 3b). For comparison, we found that remdesivir is a very potent inhibitor of different genotypes of HCV in Huh7.5 cells, with EC<sub>50</sub> values between 0.08-0.19 μM (Figure 3c). Lastly, we observed that the Huh7.5 adapted virus (P5<sup>Huh7.5</sup>) yielded similar EC<sub>50</sub> values for remdesivir as the P2<sup>VeroE6</sup> virus when tested in Huh7.5 cells (EC<sub>50</sub> values of 0.05 μM and 0.03 μM, respectively) (Table 3 and Figure 3b). Thus, the adapted P5<sup>Huh7.5</sup> virus represents a useful virus for the screening of SARS-CoV-2 polymerase inhibitors in human hepatoma cells.

## **Screening of the antiviral activity of a panel of nucs in human cells, using adapted SARS-CoV-2.**

The adapted P5<sup>Huh7.5</sup> virus permitted drug testing in Huh7.5, Calu-1 and A549 cells. We focused our screen on nucs previously shown to have antiviral effect against HCV, including sofosbuvir, a pangenotypic HCV drug used in the clinic<sup>24</sup>, but we also included broader-spectrum molecules such as galidesivir, favipiravir and ribavirin.

Among the nucs tested only remdesivir and EIDD-2801 displayed significant effect across the human cells (Table 3), as previously described<sup>25</sup>. Remdesivir was most active in Huh7.5 cells, with ~6-fold lower EC<sub>50</sub> values when compared to Calu-1 and A549 cells (Figure 4a). Despite being less active in lung carcinoma than in hepatoma cells, remdesivir was still more active in lung carcinoma Calu-1 and A549 than in Vero E6 cells (about 5-fold lower EC<sub>50</sub> compared to the P2<sup>VeroE6</sup> virus). The opposite was observed for EIDD-2801 (Figure 4b), which was more active in A549 and Calu-1 cells (6- and 3-fold more active with EC<sub>50</sub> of 1.3 μM and 2.7 μM, respectively) than in Huh7.5 cells (8.5 μM). Finally, galidesivir exhibited limited activity (Figure 4c) with relatively high EC<sub>50</sub> (>20 μM); the best inhibitory

effect was observed in A549 cells ( $EC_{50}$  of 24  $\mu$ M). Other nucs, including sofosbuvir, had no apparent activity ( $EC_{50} > 50$   $\mu$ M) in these human cell lines with our experimental conditions (Table 3).

## Discussion

In this study, we performed isolation of SARS-CoV-2 (isolate DK-AHH1) in Vero E6 cells and subsequent serial passage of the virus in human hepatoma cells (Huh7.5 clone) that led to adaptation of the virus with increased infectivity and cytopathic effect titers in both Vero E6 and Huh7.5 cells. Most importantly, human hepatoma cell culture adaptation significantly increased the viral viability in lung carcinoma cells Calu-1 and A549, as well as in the parental Huh7 cell line, which do not efficiently support replication and propagation of the original SARS-CoV-2 virus. Thus, the adapted virus might permit culture across additional human cell lines, a proposition that should be the topic of future investigations. We demonstrated that the adapted virus is an efficient tool for the screening of putative SARS-CoV-2 antiviral compounds in human cells. Active molecules, such as remdesivir and EIDD-2801, exhibited increased activity in human cells when compared to Vero E6, highlighting the importance of testing nucs in the appropriate target cells.

The Huh7.5 cell line was originally selected to permit higher replication levels of HCV subgenomic replicons<sup>13</sup> and it has been of fundamental importance for the development of efficient full-length cell culture systems for HCV<sup>14</sup>. Compared to the parental Huh7, the Huh7.5 clone exhibits a mutation that inactivates the retinoic acid-inducible gene I (RIG-I), an interferon-inducible cellular helicase involved in the type-1 interferon response, one of the features that has been correlated to increased permissiveness to HCV replication<sup>26</sup>. Interestingly, Huh7 cells are highly susceptible and permissive to SARS-CoV, which induces lytic and productive infections<sup>27</sup>. A recent study demonstrated that SARS-

241 CoV-2 is more sensitive to type-1 interferons than SARS-CoV<sup>28</sup>. Therefore decreased type-1 interferon  
 242 responses might be a key feature for enhancing the cell culture viability of SARS-CoV-2, correlating  
 243 with the high permissiveness of the Vero cell lines, which lack genes encoding type-1 interferons<sup>29</sup>.

244 Adaptation of SARS-CoV-2 to Huh7.5 cells caused an accumulation of substitutions in the S genomic  
 245 region, which might be the most important contributors to the significant increase in the viability of the  
 246 virus in lung carcinoma cells. The first complete change (present at frequencies of >99% after the first  
 247 passage) was the deletion of a loop (IHVSGTNGT) in the N-terminal domain of S. This deletion leads  
 248 to the removal of amino acid N74, which is N-glycosylated<sup>30</sup>; this loop is not present in SARS-CoV,  
 249 but it is found in MERS-CoV (Figure 5a,b). However, it is unclear how this change could contribute to  
 250 enhanced viability in culture. Another change that emerged early in most viruses was E484D, which is  
 251 located in the receptor binding motif of the receptor binding domain. Noticeably, an *in silico* study of  
 252 E484D predicted higher ACE2 binding affinity that could render a more infectious SARS-CoV-2  
 253 virus<sup>31</sup>.

254 P812R emerged only in the latest passages, when the virus exhibited maximum infectivity. P812 is  
 255 positioned near the S2' cleavage site. The proline is also present in SARS-CoV, however, at that  
 256 position, R is present in MERS-CoV (Figure 5c,d). P812R changes the sequence from “PSKR” to  
 257 “RSKR”, which corresponds to the furin consensus cleavage motif (“RX[K/R]R”)<sup>32,33</sup>, thus a putative  
 258 second furin cleavage site could have emerged at the S2'site. Whether the emergence of a new furin  
 259 cleavage motif nearby the S2' plays a role in culture adaptation by increasing membrane fusion and  
 260 therefore infectivity as seen in SARS-CoV, warrants further investigation<sup>34,35</sup>. Similarly, it was found  
 261 that cell culture adaptation (Vero cells) of the coronavirus infectious bronchitis virus (Beaudette strain)  
 262 led to the acquisition of a mutation in the S-protein creating a novel furin site downstream of the S1/S2

site that was implicated in the entry and syncytium formation in Vero cells<sup>36</sup>. On the other hand, deletions in the S1-S2 furin cleavage site have been found during culture adaptation in Vero E6 cells<sup>23,37</sup>. Finally, Q954H was present at low frequency in P1 but increased significantly in the last passages, consistent with the maximum increase in viral infectivity. Residue Q954 locates within the S2 subunit, which undergoes conformational rearrangements from prefusion to post fusion states. Specifically, this position is located within the heptad repeat 1 (HR1), which is part of the fusion-active core structure<sup>38</sup>.

As described here by us and elsewhere by others, the A549 cell line is refractory to infection with SARS-CoV-2<sup>16</sup>. For SARS-CoV, it was initially shown that low susceptibility of A549 correlated to a lack of ACE2 expression<sup>39</sup> and that exogenous expression supported enhanced SARS-CoV replication. However, natural ACE2 expression in A549 cells was reported by other groups<sup>40,41</sup>.

Another essential host entry factor for SARS-CoV-2 is the transmembrane protease, serine 2 (TMPRSS2)<sup>32</sup>. Vero E6 expressing TMPRSS2 permit enhanced isolation of SARS-CoV-2<sup>12</sup>. TMPRSS2 is also essential for entry of SARS-CoV, specifically the isoform 1 of the protein, directly linked to the activation of the spike protein<sup>42</sup>. This isoform was found to be expressed in virus target cells (such as Calu-3), but was lacking in the A549 cells<sup>42</sup>. Interestingly, TMPRSS2 was not detected in Huh7 cells<sup>43</sup> either, and thus this could be one of the contributors to the poor virus viability in A549 and in Huh7 cells. It is tempting to speculate that a possible explanation for the significant enhanced viability of the Huh7.5 adapted virus in A549 and Huh7 cells, could relate to the acquisition of the furin cleavage site by substitution P812R, which could compensate for a putative low activation of the spike due to inadequate TMPRSS2 expression. This finding merit further investigations.

The efficient culture of SARS-CoV-2 permitted the screening of a class of polymerase inhibitors (nucs) in relevant cell culture models. As previously described by others, we found that nucs remdesivir and EIDD-2801 exhibited increased activity in human cells compared to Vero cells<sup>10,25</sup>. For remdesivir, maximum activity was observed when using human hepatoma cells, as expected since this compound originated from the HCV antiviral program, and like sofosbuvir, is masked by a McGuigan prodrug moiety, leading to a significant accumulation of the active compound in the liver<sup>44</sup>. In the present study, we also show proof-of-concept of the potent inhibitory effect of remdesivir against recombinants of HCV genotypes 1, 2 and 3 that recapitulate the entire viral life cycle, with EC<sub>50</sub> values lower than those routinely obtained with sofosbuvir<sup>45–48</sup>. For EIDD-2801, maximal activity was observed in lung cells, in agreement with previous studies showing high activity of the drug in human airway epithelia infected with influenza virus<sup>49</sup>. The EC<sub>50</sub> values of remdesivir in Vero E6 and Calu-1 cells obtained in this study were very similar to those reported before for Vero and Calu-3 cells, respectively<sup>10</sup>. However, for EIDD-2801 (oral bioavailable prodrug of NHC) the EC<sub>50</sub> values in Calu-1 and A549 cells were higher than previously reported NHC values in Calu-3<sup>25</sup>, which could be explained by the use of the prodrug in our study.

Our investigated panel of nucs included molecules that had been previously shown to inhibit the virus (remdesivir and EIDD-2801), but also compounds that had been proposed as drug candidates. Strikingly no other analogs than remdesivir and EIDD-2801 showed a significant inhibitory effect in our experimental conditions, including sofosbuvir, which had been the subject of extensive *in silico* investigations<sup>50</sup> and was found to cause chain termination of the SARS-CoV-2 polymerase *in vitro*<sup>51</sup>. It is important to acknowledge that studies only assessing incorporation and chain termination of nucleotide analogs as antiviral strategies against coronaviruses lack a complete overview of the

306 structural requirements for viral replication, including the role of the nsp14 exonuclease in excising  
307 these molecules, which remdesivir overcomes<sup>52</sup>. Favipiravir, a broad-spectrum antiviral with similar  
308 mechanism of action to EIDD-2801, exhibited no antiviral effect in our experimental conditions, but  
309 contrarily showed anecdotal activity in patients<sup>53</sup>. However proper randomized trials are needed to  
310 confirm these findings.

311 The broad-spectrum nuc galidesivir<sup>54</sup> exhibited a detectable inhibitory effect against SARS-CoV-2, but  
312 significantly lower activity when compared to remdesivir and EIDD-2801. In light of the detectable  
313 inhibitory effect, it could be relevant to test the efficacy of this drug in primary airway cultures and in  
314 longer-term treatment assays where multiple doses of the compound are added into the culture to  
315 further elucidate the potential antiviral use of this compound.

316 We demonstrated that the activity of remdesivir in Huh7.5 cells was very similar between the P2<sup>VeroE6</sup>  
317 and the adapted P5<sup>Huh7.5</sup> virus, despite the later exhibiting multiple changes in the genome. Since these  
318 changes concentrated in the S-protein and not in the nsp12 protein, which is the main target of nucs,  
319 this virus represents an excellent tool to study this drug class in human cells. However, the mutations  
320 present in the adapted virus could potentially interfere with entry processes and therefore this  
321 experimental system might not be an optimal tool for the screening of entry/fusion inhibitors.

322 It is important to continue evaluating antiviral strategies against SARS-CoV-2, that could also be  
323 applied to other pandemic coronaviruses. Our cell culture adapted virus with increased viability in  
324 human cells could contribute to a more efficient and relevant screening of candidate compounds  
325 inhibiting viral replication. The cell-culture adaptation strategy shown in this study can represent a  
326 venue for the efficient culture of other coronaviruses with restricted viability in human cell lines.



## 327 **Materials and Methods**

328 **Cell culture experiments.** All experiments in this study were performed with a novel isolate of the  
 329 SARS-CoV-2 virus (SARS-CoV-2/human/Denmark/DK-AHH1/2020). Initial culture of SARS-CoV-  
 330 2\_DK-AHH1 was performed in African green monkey kidney cells (Vero E6). Residual  
 331 nasopharyngeal sample material was obtained after clinical diagnosis with COVID-19 (SARS-CoV-2  
 332 Ct value of 14 in RT-PCR assay<sup>55</sup>) and irreversible anonymization. For inoculation, 30 µL of the  
 333 diluted sample were added into 100,000 Vero E6 cells, seeded in 12-well plates, 24 hour prior, at a  
 334 final volume of 1 mL. For the initial inoculation experiment, Vero E6 cells were cultured in DMEM  
 335 (high glucose, GlutaMAX and pyruvate, Invitrogen) supplemented with 10% fetal bovine serum  
 336 (Sigma) and Antibiotic-Antimycotic (10,000 units/mL of penicillin, 10,000 µg/mL of streptomycin,  
 337 and 25 µg/mL of Amphotericin B, Gibco) and kept at 37°C in a humidified incubator with 5% CO<sub>2</sub>.  
 338 Afterwards, all experiments in Vero E6 were performed with media supplemented only with FBS 10%,  
 339 10,000 units penicillin and 10 mg streptomycin/mL (Sigma). The culture was visually inspected under  
 340 an inverted light microscope and supernatant was harvested daily and stored at -80°C. A first viral  
 341 passage from the original inoculated culture was performed with 0.5 mL of harvested supernatant from  
 342 day 2 post-inoculation in naïve Vero E6 cells in a T-25 flask with 10<sup>6</sup> cells, with a final volume of 4  
 343 mL (approximate MOI of 0.02). Two independent second passages were performed with supernatants  
 344 harvested at passage 1 day 2 (approximate MOI of 0.9) and day 3 (MOI not determined), respectively.  
 345 For that purpose, 1.5 mL of first passage supernatant was used to infect 5×10<sup>6</sup> cells (final volume of 30  
 346 mL). A large viral stock was prepared by pooling 30 mL of filtered supernatant (0.45 µM filter,  
 347 Sartorius) from the samples harvested at days 2 and 3 from both second passages (total of 120 mL),  
 348 aliquoted, and stored at -80°C.

Human hepatoma cells (Huh7 and Huh7.5 cells) and Calu-1 were cultured in DMEM (high glucose, GlutaMAX and pyruvate, Invitrogen ThermoFisher) supplemented with 10% fetal bovine serum (Sigma), 10,000 units penicillin and 10 mg streptomycin/mL (Sigma), and kept at 37°C in a humidified incubator with 5% CO<sub>2</sub>. A549 cells were cultured in the same conditions but with Ham's F-12K (Kaighn's) Medium (Gibco, ThermoFisher) supplemented with the same 10% fetal bovine serum and antibiotics. Culture of HCV was performed as previously described<sup>14,45,46</sup>.

**Serial passage of the SARS-CoV-2 virus in Huh7.5 cells.** A total of six passages were conducted in Huh7.5 cells. Passages were performed by inoculating 10<sup>6</sup> naïve cells (seeded in a T-25 flask) with a 1/10 dilution of the P2<sup>VeroE6</sup> virus (P1) or with 0,5 mL of supernatant for subsequent passages. The fifth passage was carried out in T-175 flasks (approximately 5 million cells seeded), for production of a large volume to generate a viral stock, which was used for the subsequent assays.

**Determination of viral titers.** Infectivity titers were expressed as 50% tissue culture infectious dose per mL (TCID<sub>50</sub>/mL). TCID<sub>50</sub> assays were performed in 96-well plates, by infecting naïve cells with 100 µL of 10-fold serially diluted virus containing supernatants, in quadruplicates, followed by immunostaining of the SARS-CoV-2 spike protein (as described below) at 72-hr post infection. Presence or absence of infected cells in each replicate was scored and used to determine TCID<sub>50</sub>/mL values based on calculations obtained by the Reed and Muench method (as described in Fields Virology, 5<sup>th</sup> edition<sup>56</sup>).

A CPE assay to determine the cytopathic effect 50% titer (CPE<sub>50</sub>/mL) was developed with similar conditions as those for the infectivity assay with infections of naïve cells with 100 µL of 10-fold dilutions of virus containing supernatants, in quadruplicates. CPE was assessed 72-hr post infection

370 with the Viral ToxGlo Assay (Promega) following the manufacture's instructions. Relative light units  
371 (RLU) obtained for each infected well was normalized to the RLU of non-infected controls (100% cell  
372 normality or cell viability), values under 90% were considered positive for CPE, and the Reed and  
373 Muench method was used to calculate a  $\text{Log}_{10}$  CPE<sub>50</sub>/mL titer. The assay was validated by correlating  
374 titer values obtained with the Viral ToxGlo Assay with visual inspections of the cells under a light  
375 microscope in multiple assays.

376 All graphical representations and statistical analysis were performed using GraphPad Prism 8.

377 **Sequencing of SARS-CoV-2 viruses.** The viral sequencing of SARS-CoV-2 recovered from the  
378 original clinical specimen and from all cell-culture derived supernatants was performed in an identical  
379 manner with next-generation sequencing of near-full-length genomes from 5 overlapping-amplicons in  
380 each pool. The methodologies for RNA extraction, generation of cDNA by reverse-transcription (RT)  
381 and amplification of these overlapping amplicons were adapted from existing protocols for the  
382 amplification of the complete open-reading frame of HCV<sup>57</sup>. Specific SARS-CoV-2 primers can be  
383 found in Table 4. Determination of the 5'UTR of the original clinical specimen and of the cell culture  
384 recovered P2<sup>VeroE6</sup> viruses was determined using a template-switching RT method and reagents from  
385 New England Biolabs and following guidelines. Gene-specific RT primers can be found in Table 4.  
386 The 3'UTR was determined by RT-PCR with an oligo-dT anchor primer (Sigma) as described<sup>58</sup> with  
387 primers found in Table 4. NGS analysis was performed as described previously<sup>59</sup> with minor  
388 modifications. In short, reads were trimmed from PCR primer sequences at the 5' end by Cutadapt<sup>60</sup> to  
389 remove the bias of the 5 overlapping amplicons. Next, reads were mapped to the Wuhan-Hu-1  
390 reference sequence. Subsequently, consensus and low frequency SNPs and indel calling was  
391 performed.

392 **Immunostaining of SARS-CoV-2 infected cell cultures.** Following different assays, 96-well plates  
 393 with confluent cell layers were fixed and virus was inactivated by immersion in 100% methanol  
 394 (MERCK) for 20 min. Cells were washed twice with PBST (PBS containing 0.1% Tween-20),  
 395 followed by incubation with 3% H<sub>2</sub>O<sub>2</sub> for 10 min to block endogenous peroxidase activity and washed  
 396 twice with PBST. Cells were then incubated with primary antibody SARS-CoV-2 spike chimeric  
 397 monoclonal antibody (Sino Biological #40150-D004) diluted 1:5000 in PBS with 1% bovine serum  
 398 albumin and 0.2% skim milk powder (PBSK) overnight at 4 °C. Afterwards, cells were washed twice  
 399 with PBST followed by 1-hour incubation with secondary antibody F(ab')<sub>2</sub>-Goat anti-Human IgG Fc  
 400 Cross-Adsorbed Secondary Antibody, HRP (Invitrogen #A24476) diluted 1:2000 in PBSK. Cells were  
 401 washed twice with PBST, single infected cells were visualized with DAB substrate (Immunologic #  
 402 BS04-110) and counted automatically by an ImmunoSpot series 5 UV analyzer (CTL Europe GmbH),  
 403 as previously described for the forming-focus unit assays developed to study HCV in culture<sup>61,62</sup>.  
 404 Example of the immunostaining experiments output (images) can be seen in Figures 1d and 2c.

405 **Treatment assays.** Antivirals were obtained from Acme Bioscience and reconstituted in DMSO. For  
 406 each drug tested, cytotoxicity assays were performed in the different cell types studied, using the Cell  
 407 Titer AQueous One Solution Cell Proliferation Assay (MTS assay, Promega). The 50% cytotoxic  
 408 concentration (CC<sub>50</sub>, µM) was calculated by regression analysis. In brief, cells were seeded in 96-well  
 409 plates and drug dilutions were added the next day, in triplicates. At 72-hr post-infection, the MTS  
 410 reagent was added, and absorbance was measured after 1 hour incubation at 37°C. Results of treated  
 411 well were normalized to non-treated controls and the percentage of cell viability was plotted against the  
 412 Log<sub>10</sub> of drug concentration, followed by non-linear regression ( $Y = \text{Bottom} + (\text{Top} -$

413 Bottom)/(1+10<sup>^((LogCC<sub>50</sub>-X)\*HillSlope)) using GraphPad Prism 8. All treatments shown were  
414 conducted at non-cytotoxic concentrations (defined as cell viability ≥80%).</sup>

415 To explore the overall antiviral activity of drug candidates (drug potency), cells were seeded in 96-well  
416 plates and the next day, 50 μL of virus (at a specific MOI that led to a robust infection of all non-  
417 treated control wells, depending on the cell type) and 50 μL of drug (different concentrations as  
418 indicated) were added and the cells were incubated for 72 hr. After the 72-hr incubation, plates were  
419 processed for SARS-CoV-2 S-protein immunostaining as described above. The analysis was performed  
420 by counting the number of antigen-positive cells which were then normalized to non-treated controls  
421 (after subtraction of the background levels obtained from non-infected wells), and EC<sub>50</sub> (effective  
422 concentration 50%) values were obtained after non-linear regression, as stated above.

423 **Acknowledgements**

424 We thank Bjarne Ørskov Lindhardt (Hvidovre Hospital) and Carsten Geisler (University of  
425 Copenhagen) for their support of these studies, and Anna-Louise Sørensen, Susanne Ruszczycka and  
426 Louise Barny Christensen, Hvidovre Hospital, for technical support.

## 427 Figure Legends

428 **Figure 1. Adaptation of SARS-CoV-2 to efficient growth in Huh7.5 cells. 1a:** schematic overview  
 429 of the serial passages performed in Vero E6 and Huh7.5 cells. Dishes represent the culture surfaces,  
 430 green and red color for Vero E6 and Huh7.5 cells, respectively. The harvested day used for passage is  
 431 indicated above the arrow that symbolizes the transfer of culture supernatant to naïve cells. **1b:**  
 432 comparative infectivity titers of the P2<sup>VeroE6</sup> and P5<sup>Huh7.5</sup> viruses in Huh7.5 (red), Vero E6 (green), and  
 433 Huh7 (yellow) cells. Infectivity titers ( $\text{Log}_{10}\text{TCID}_{50}/\text{mL}$ ) are shown on the y-axis. Results are based on  
 434 several independent experiments: for P2<sup>VeroE6</sup> and P5<sup>Huh7.5</sup> in Huh7.5 cells, 6 and 2 independent  
 435 experiments with 4 replicates each are represented, respectively. In a third independent titration  
 436 experiment end-point dilution for the P5<sup>Huh7.5</sup> virus was not achieved ( $\text{Log}_{10}\text{TCID}_{50}/\text{mL} > 7$ ) and thus  
 437 the data was not included in the graph. For the Vero E6 cells, the data presented in the graph  
 438 corresponds to 5 (P2<sup>VeroE6</sup>) and 4 (P5<sup>Huh7.5</sup>) independent experiments with 4 replicates each. For the  
 439 parental Huh7 cells, results are based on 3 independent experiments for each virus. Bars represent the  
 440 mean and standard error of the mean (SEM) of the different independent experiments. Statistical  
 441 significance ( $p < 0.05$ , unpaired t-test) is highlighted with an asterisk (\*). **1c:** comparative cytopathic  
 442 effect titers of the P2<sup>VeroE6</sup> and P5<sup>Huh7.5</sup> viruses in Huh7.5 (red), Vero E6 (green) and Huh7 (yellow)  
 443 cells. Cytopathic effect titers ( $\text{Log}_{10}\text{CPE}_{50}/\text{mL}$ ) are shown on the y-axis. For P2<sup>VeroE6</sup> and P5<sup>Huh7.5</sup> in  
 444 both Huh7.5 and Vero E6 cells, results are based on 3 independent experiments with 4 replicates each.  
 445 For the P2<sup>VeroE6</sup> virus in Huh7.5 cells only one experiment yielded a CPE value over the threshold and  
 446 thus the value was not plotted (depicted with the “#” symbol, threshold calculated as stated in Materials  
 447 and Methods). In the case of the parental Huh7 cells, results are based on 3 independent experiments as  
 448 well, and none of the experiments with the P2<sup>VeroE6</sup> virus yielded values over the assay threshold (#).

Bars represent the SEM of the different independent experiments. Statistical significance ( $p < 0.05$ , unpaired t-test) is highlighted with an asterisk (\*). **1d:** visual comparative SARS-CoV-2 antigen staining of both the P2<sup>VeroE6</sup> and P5<sup>Huh7.5</sup> viruses infecting Huh7.5 cells and blank (non-infected cells), from a representative TCID<sub>50</sub> assay. Each picture represents a replicate of infections performed at the indicated dilution (non-cytopathic) for each virus and were obtained after HRP staining with an anti-spike antibody, using the ImmunoSpot series 5 UV analyzer as described in Materials and Methods.

**Figure 2. Adaptation of SARS-CoV-2 to Huh7.5 cells permits culture of human lung carcinoma cells Calu-1 and A549. 2a:** comparative infectivity titers of the P2<sup>VeroE6</sup> and the P5<sup>Huh7.5</sup> viruses in Calu-1 (blue) and A549 (magenta) cells. Infectivity titers ( $\text{Log}_{10}\text{TCID}_{50}/\text{mL}$ ) are shown on the y-axis. For each cell line, results are based on 3 independent experiments with 4 replicates each. For the P2<sup>VeroE6</sup> virus in A549 cells none of the experiments yielded detectable titers (#). Bars represent the mean and SEM of the different independent experiments. Statistical significance ( $p < 0.05$ , unpaired t-test) is highlighted with an asterisk (\*). **2b:** comparative cytopathic effect of the P2<sup>VeroE6</sup> and the P5<sup>Huh7.5</sup> viruses in Calu-1 (blue) and A549 (magenta) cells. Cytopathic effect titers ( $\text{Log}_{10}\text{CPE}_{50}/\text{mL}$ ) are shown on the y-axis. Results are based on two independent experiments with 4 replicates each. CPE was under the detection limit in the two experiments with the P2<sup>VeroE6</sup> virus in both cell lines (#). **2c:** visual comparative SARS-CoV-2 antigen staining of P2<sup>VeroE6</sup> and P5<sup>Huh7.5</sup> in Calu-1 (upper panel) and A549 (lower panel), from a representative TCID<sub>50</sub> assay. Pictures represent 4 replicates of infections performed with the indicated virus dilution (from a representative TCID<sub>50</sub> assay) and were obtained after HRP staining with an anti-spike antibody, using the ImmunoSpot series 5 UV analyzer as described in Materials and Methods.



**Figure 3. Antiviral activity of remdesivir against SARS-CoV-2 in Vero E6 and Huh7.5 cells and comparison with its activity against HCV genotypes 1-3 in Huh7.5 cells. 3a and b:** antiviral activity of remdesivir against the P2<sup>VeroE6</sup> virus in Vero E6 cells (3a) and in Huh7.5 cells (3b). The graph shows the non-linear regression curve of the number of SARS-CoV-2 infected cells normalized to non-treated controls (y-axis) of triplicate wells of infected cells treated with different remdesivir concentrations (Log<sub>10</sub>, x-axis). The dots represent the mean, and SEM are shown as lines. EC<sub>50</sub> values (drug concentration unit is μM) inferred from the regression are shown as well. **3c:** antiviral activity of remdesivir against different genotypes of HCV (genotype 1, strain TNcc in black, genotype 2, strain J6/JFH1 in blue and genotype 3, strain DBN3acc in orange) in Huh7.5 cells performed as previously described for sofosbuvir studies<sup>45-48</sup>.

**Figure 4. Comparative antiviral activity of remdesivir, EIDD-2801 and galidesivir against SARS-CoV-2\_DK-AAH1 in different human cell lines. 4a, b and c:** comparative antiviral activity of remdesivir (4a), EIDD-2801(4b) and galidesivir (4c) against the P5<sup>Huh7.5</sup> virus in 3 different human cell lines (Huh7.5, red; Calu-1, blue; and A549, magenta). The graph shows the non-linear regression curve of the number of SARS-CoV-2 infected cells normalized to non-treated controls (y-axis) of triplicate wells of infected cells treated with different drug concentrations (Log<sub>10</sub>, x-axis). The dots represent the mean, and SEM are shown as lines. EC<sub>50</sub> values can be found in Table 3.

**Figure 5. Structural overview of changes found in the S-protein of SARS-CoV-2 after culture adaptation in Huh7.5 cells.** Multiple alignment of the partial S-protein sequences of SARS-CoV-2 (GenBank accession number MN908947), P2<sup>VeroE6</sup> virus, P5<sup>Huh7.5</sup> virus, SARS-CoV (GenBank accession number AY278741) and MERS-CoV (GenBank accession number JX869059). The alignment was carried out using the MUSCLE software<sup>63</sup>. **5a:** Alignment of the area containing the N-

terminal 9 amino acid deletion in Huh7.5 adapted viruses, which corresponds to the protein specific positions indicated with numbers. The SARS-CoV-2 sequences are shown in green with the N74 glycosylation site highlighted in yellow, the SARS-CoV sequence in grey and the MERS-CoV sequence in black. **5b:** Structural alignments of SARS-CoV and MERS-CoV spike proteins (PDB entries 5X58<sup>64</sup> and 6Q04<sup>65</sup>, respectively) to the SARS-CoV-2 spike protein (PDB entry 7JJI<sup>66</sup>) using PyMOL<sup>67</sup> with the same parts of the sequences shown in 5a. The same color coding as in 5a is used. N74 is shown as sticks in SARS-CoV-2 and an attached glycan is illustrated schematically. The P5<sup>Huh7.5</sup> structure was generated from the SARS-CoV-2 structure by introducing the deletion and modelling the loop closure ("HAKRFD") with ModLoop<sup>68</sup>. **5c:** Alignment of the area around the S2' cleavage site (indicated with a red arrow). The observed P812R mutation is highlighted in orange. **5d:** Structural alignments with the same parts of the sequences as shown in 5c. Structures were generated as explained in 5b using the same PDB entries except for the SARS-CoV spike protein (PDB entry 5XLR<sup>69</sup>). Residues that align with P812 and R815 in SARS-CoV-2 are represented as sticks. A part of the MERS-CoV sequence ("SISTGSR") was modelled using ModLoop<sup>68</sup>, as the residues were missing in the experimental structure. The S2' cleavage site is indicated with a red arrow.

| Nucleotide position | Nucleotide in Wuhan-Hu-1 | Nucleotide in DK-AHH1 | Frequency in original swab sample (%) | Frequency in P2 <sup>VeroE6</sup> virus (%) | Amino-acid change | Genomic region |
|---------------------|--------------------------|-----------------------|---------------------------------------|---------------------------------------------|-------------------|----------------|
| 71                  | C                        | T                     | .                                     | 6,3                                         | -                 | 5'UTR          |
| 241                 | C                        | T                     | 99,7                                  | 99,6                                        | -                 | 5'UTR          |
| 1059                | C                        | T                     | 99,9                                  | 99,7                                        | T->I              | nsp2           |
| 3037                | C                        | T                     | 99,6                                  | 99,4                                        | -                 | nsp3           |
| 10465               | G                        | A                     | 99,8                                  | 99,7                                        | -                 | nsp5           |
| 14408               | C                        | T                     | 99,8                                  | 99,7                                        | P->L              | nsp12          |
| 21646               | C                        | T                     | 0,6                                   | 9,9                                         | -                 | S              |
| 21742               | C                        | T                     | 99,8                                  | 99,8                                        | -                 | S              |
| 22487               | G                        | A                     | 81,8                                  | 56,9                                        | E->K              | S              |
| 23403               | A                        | G                     | 99,9                                  | 99,7                                        | D->G              | S              |
| 25563               | G                        | T                     | 99,9                                  | 99,8                                        | Q->H              | ORF3a          |
| 28899               | G                        | T                     | 99,9                                  | 99,5                                        | R->I              | N              |

**Table 1. Sequence comparison between the Wuhan-Hu-1 and DK-AHH1 isolates.** The near complete SARS-CoV-2 virus genome was sequenced by NGS from 5 overlapping RT-PCR amplicons using a cut-off of 5%, and changes over the cut-off in one sample are shown; to obtain the complete sequence the 5' and 3' termini were determined by Sanger sequencing of RT-PCR amplicons. Differences are shown as nucleotide position (number) according to the reference sequence of the Wuhan-Hu-1 isolate (genbank NC045512.2), followed by the specific nucleotide in the reference sequence and in the DK-AHH1 isolate. Original swab refers to the sequence from the patient diagnosed with SARS-CoV-2. The P2<sup>VeroE6</sup> virus refers to the stock of the second passage in Vero E6 cells. The frequency of the changes in the sequences of the two analyzed viruses (percentage of the reads) is shown in the next two columns. Sequence identity is represented by a dot. Nucleotide sequences were translated *in silico*, and if the nucleotide changes led to a substitution the corresponding amino acid is indicated (original amino acid->new amino acid). Synonymous changes are represented with a dash “-”. The genomic region for each change is also indicated.

| Nucleotide position | P2 <sup>VeroE6</sup> | Nucleotide change | P1 <sup>Huh7.5</sup> | P5 <sup>Huh7.5</sup> | P6 <sup>Huh7.5</sup> | Amino-acid change | Genomic region |
|---------------------|----------------------|-------------------|----------------------|----------------------|----------------------|-------------------|----------------|
| 7917                | A                    | T                 | 16,7                 | 37,5                 | 22,2                 | E->V              | nsp3           |
| 11522               | T                    | G                 | 3,1                  | 61,9                 | 83,7                 | F->V              | nsp6           |
| 11750               | C                    | T                 | 3,9                  | 12,3                 | 7,0                  | L->F              | nsp6           |
| 16347               | A                    | G                 | .                    | 12,6                 | 19,5                 | -                 | nsp13          |
| 19895               | C                    | T                 | .                    | 30,7                 | 33,8                 | A->V              | nsp15          |
| 20482               | T                    | C                 | .                    | .                    | 5,0                  | S->P              | nsp15          |
| 20483               | C                    | T                 | .                    | 0,8                  | 5,2                  | S->F              | nsp15          |
| 21752               | T                    | A                 | .                    | 24,6                 | 46,9                 | W->R              | S              |
| 21762...21788       | CTA...GTA            | Δ                 | 100                  | 99,9                 | 99,9                 | Δ9                | S              |
| 22110               | A                    | G                 | 2,4                  | 5,6                  | 1,1                  | Q->R              | S              |
| 22264               | C                    | T                 | 0,6                  | 24,7                 | 23,2                 | -                 | S              |
| 23014               | A                    | C                 | 92,4                 | 98,7                 | 99,7                 | E->D              | S              |
| 23997               | C                    | G                 | .                    | 92,9                 | 99,2                 | P->R              | S              |
| 24424               | A                    | C                 | 3,2                  | 93,1                 | 98,3                 | Q->H              | S              |
| 24983               | T                    | G                 | .                    | 6,7                  | 5,9                  | L->V              | S              |
| 26187               | T                    | C                 | 82,6                 | 85,7                 | 81,6                 | -                 | ORF3a          |
| 26333               | C                    | T                 | 1,0                  | 14,8                 | 20,9                 | T->I              | E              |
| 28331               | C                    | T                 | .                    | 13,5                 | 17,4                 | P->S              | N              |

**Table 2. Sequence analysis of the viruses harvested after passage in Huh7.5 cells.** The near full-length sequence of the SARS-CoV-2 virus grown in VeroE6 and in Huh7.5 cells (missing the first 30 and the last 65 nucleotides) was obtained by NGS (cut-off 5%). The sequence of the P2<sup>VeroE6</sup> virus is used as reference and the differences in the Huh7.5 recovered viruses are indicated. “Δ” refers to deletion. The P2<sup>VeroE6</sup> virus refers to the stock pool of the second passage in Vero E6 cells. For the viruses recovered from Huh7.5 cells, the days used for sequencing were day 12 for P1<sup>Huh7.5</sup>, day 3 (stock) for P5<sup>Huh7.5</sup> and day 4 for P6<sup>Huh7.5</sup>. For more details refer to Table 1 legend.

|                | EC <sub>50</sub> (μM) |        |      |
|----------------|-----------------------|--------|------|
|                | Huh7.5                | Calu-1 | A549 |
| Remdesivir     | 0.05                  | 0.29   | 0.31 |
| EIDD-2801      | 8.5                   | 2.7    | 1.3  |
| Galidesivir    | 48                    | 58     | 24   |
| Sofosbuvir     | >50                   | >50    | >50  |
| Uprifosbuvir   | >50                   | >50    | >50  |
| Valopicitabine | >50                   | >50    | >50  |
| Mericitabine   | >50                   | >50    | >50  |
| Ribavirin      | >50                   | >50    | >50  |
| Favipiravir    | >50                   | >50    | >50  |

**Table 3. Anti-SARS-CoV-2 activity of a panel of nucleos(t)ide analogs in different human cells.**

For each compound, the antiviral activity in Huh7.5, Calu-1 or A549 cells is indicated by EC<sub>50</sub> values (μM). These values were inferred from concentration-response curves as shown in Figure 4. All compounds were tested at non-cytotoxic concentrations as described in Materials and Methods. For remdesivir the maximum concentration tested was 10 μM. For EID-2801 the maximum concentration tested was 50 μM. “>50” indicates that the maximum concentration tested was 50 μM and that no viral inhibition tending towards or reaching 50% was observed at this concentration. The maximum concentration tested for galidesivir was 100 μM (since clear inhibitory effects were observed at 50 μM and 100 μM was non-cytotoxic).

|                                                   |                                                          |  |
|---------------------------------------------------|----------------------------------------------------------|--|
| <b>Amplicon 1: nt 1-6171. Sequence 5'-3'</b>      |                                                          |  |
| RT primer                                         | GCCACCACATCACCATTTA                                      |  |
| PCR forward                                       | ATTAAAGGTTTATACCTTCCCAGGTAACAAAC                         |  |
| PCR reverse                                       | GCCACCACATCACCATTTAAGTCA                                 |  |
| <b>Amplicon 2: nt 6108-11945. Sequence 5'-3'</b>  |                                                          |  |
| RT primer                                         | ACTGGACACATTGAGCC                                        |  |
| PCR forward                                       | AGAAACCTGCTTCAAGAGAGCTT                                  |  |
| PCR reverse                                       | ACTGGACACATTGAGCCCACA                                    |  |
| <b>Amplicon 3: nt 11796-17904. Sequence 5'-3'</b> |                                                          |  |
| RT primer                                         | ACAAGAGTGAGCTGTTTCA                                      |  |
| PCR forward                                       | TGTTGGGTGTTGGTGGCAAA                                     |  |
| PCR reverse                                       | ACAAGAGTGAGCTGTTTCAGTGG                                  |  |
| <b>Amplicon 4: nt 17832-23916. Sequence 5'-3'</b> |                                                          |  |
| RT primer                                         | ACTTGTGCAAAAATTCTTGG                                     |  |
| PCR forward                                       | TGTTGATTCATCACAGGGCTCAGA                                 |  |
| PCR reverse                                       | ACTTGTGCAAAAATTCTTGGGTG                                  |  |
| <b>Amplicon 5: nt 23854-3'end. Sequence 5'-3'</b> |                                                          |  |
| RT primer                                         | Anchored Oligo(dT)20 (Invitrogen, USA)                   |  |
| PCR forward                                       | CCGTGCTTTAACTGGAATAGCTGT                                 |  |
| PCR reverse                                       | GTCATTCTCCTAAGAAGCTATTAAAATCACATG                        |  |
| <b>5'UTR. Sequence 5'-3'</b>                      |                                                          |  |
| RT primer                                         | TAAGCCACTGGTATTTTCGCC                                    |  |
| Template switch oligo                             | /5InvddT/GTCGCACGGTCCATCGCAGCAGTCACArGrG+G               |  |
| PCR forward                                       | GTCGCACGGTCCATCGCAGCAGTC                                 |  |
| PCR reverse                                       | GTGTCTCACCCTACGACCGTT                                    |  |
| <b>3'UTR. Sequence 5'-3'</b>                      |                                                          |  |
| RT primer                                         | GACCACGCGTATCGATGTGCGACTTTTTTTTTTTTTTTTV (V= A, C, or G) |  |
| PCR forward                                       | TGGATGACAAAGATCCAAATTTCAAAGA                             |  |
| PCR reverse                                       | GACCACGCGTATCGATGTGCGAC                                  |  |

539

540 **Table 4. Primers used for SARS-CoV-2 genome amplification procedures.** RT (reverse-  
541 transcription) and PCR primers (forward and reverse) for each amplicon covering the near full-length  
542 PCR strategy (a single RT reaction was performed by pooling all the 5 RT primers, which served as  
543 template for each of the independent PCR reactions generating the 5 overlapping amplicons) and the  
544 ends of the untranslated regions (UTR) are shown in the table. Nucleotide numbering according to the  
545 Wuhan-Hu-1 isolate (genbank NC\_045512.2). RT and PCR primers for the determination of the  
546 3'UTR were obtained from Sigma. The remaining primers were purchased from TAG Copenhagen.

## References

1. Lu, R. *et al.* Genomic characterisation and epidemiology of 2019 novel coronavirus: implications for virus origins and receptor binding. *Lancet* **395**, 565–574 (2020).
2. Dong, E., Du, H. & Gardner, L. An interactive web-based dashboard to track COVID-19 in real time. *Lancet Infect Dis* **20**, 533–534 (2020).
3. Ackermann, M. *et al.* Pulmonary Vascular Endothelialitis, Thrombosis, and Angiogenesis in Covid-19. *N Engl J Med* **383**, 120–128 (2020).
4. Gupta, A. *et al.* Extrapulmonary manifestations of COVID-19. *Nat Med* **26**, 1017–1032 (2020).
5. The species Severe acute respiratory syndrome-related coronavirus: classifying 2019-nCoV and naming it SARS-CoV-2. *Nat Microbiol* **5**, 536–544 (2020).
6. Pruijssers, A. J. & Denison, M. R. Nucleoside analogues for the treatment of coronavirus infections. *Curr Opin Virol* **35**, 57–62 (2019).
7. Stuyver, L. J. *et al.* Ribonucleoside analogue that blocks replication of bovine viral diarrhea and hepatitis C viruses in culture. *Antimicrob Agents Chemother* **47**, 244–254 (2003).
8. Cho, A. *et al.* Synthesis and antiviral activity of a series of 1'-substituted 4-aza-7,9-dideazaadenosine C-nucleosides. *Bioorg Med Chem Lett* **22**, 2705–2707 (2012).
9. Takayama, K. In Vitro and Animal Models for SARS-CoV-2 research. *Trends Pharmacol Sci* **41**, 513–517 (2020).
10. Pruijssers, A. J. *et al.* Remdesivir Inhibits SARS-CoV-2 in Human Lung Cells and Chimeric SARS-CoV Expressing the SARS-CoV-2 RNA Polymerase in Mice. *Cell Rep* **32**, 107940 (2020).
11. Blanco, R. *et al.* A gene-alteration profile of human lung cancer cell lines. *Hum Mutat* **30**, 1199–1206 (2009).
12. Matsuyama, S. *et al.* Enhanced isolation of SARS-CoV-2 by TMPRSS2-expressing cells. *Proc Natl Acad Sci USA* **117**, 7001 (2020).
13. Blight, K. J., McKeating, J. A. & Rice, C. M. Highly permissive cell lines for subgenomic and genomic hepatitis C virus RNA replication. *J Virol* **76**, 13001–13014.
14. Ramirez, S. & Bukh, J. Current status and future development of infectious cell-culture models for the major genotypes of hepatitis C virus: Essential tools in testing of antivirals and emerging vaccine strategies. *Antiviral Res.* **158**, 264–287 (2018).

- 576 15. Korber, B. *et al.* Tracking Changes in SARS-CoV-2 Spike: Evidence that D614G Increases  
577 Infectivity of the COVID-19 Virus. *Cell* **182**, 812-827.e19 (2020).
- 578 16. Chu, H. *et al.* Comparative tropism, replication kinetics, and cell damage profiling of SARS-  
579 CoV-2 and SARS-CoV with implications for clinical manifestations, transmissibility, and laboratory  
580 studies of COVID-19: an observational study. *Lancet Microbe* **1**, e14–e23 (2020).
- 581 17. Cavazzoni, A. *et al.* Effect of inducible FHIT and p53 expression in the Calu-1 lung cancer cell  
582 line. *Cancer Lett* **246**, 69–81 (2007).
- 583 18. Gazdar, A. F., Girard, L., Lockwood, W. W., Lam, W. L. & Minna, J. D. Lung cancer cell lines  
584 as tools for biomedical discovery and research. *J Natl Cancer Inst* **102**, 1310–1321 (2010).
- 585 19. van Diepen, A. *et al.* Quantitative proteome profiling of respiratory virus-infected lung  
586 epithelial cells. *J Proteomics* **73**, 1680–1693 (2010).
- 587 20. Han, J. *et al.* Genome-wide CRISPR/Cas9 Screen Identifies Host Factors Essential for  
588 Influenza Virus Replication. *Cell Rep* **23**, 596–607 (2018).
- 589 21. Pizzorno, A. *et al.* In vitro evaluation of antiviral activity of single and combined repurposable  
590 drugs against SARS-CoV-2. *Antiviral Res* **181**, 104878 (2020).
- 591 22. Choy, K.-T. *et al.* Remdesivir, lopinavir, emetine, and homoharringtonine inhibit SARS-CoV-2  
592 replication in vitro. *Antiviral Res* **178**, 104786 (2020).
- 593 23. Ogando, N. S. *et al.* SARS-coronavirus-2 replication in Vero E6 cells: replication kinetics, rapid  
594 adaptation and cytopathology. *J Gen Virol* (2020) doi:10.1099/jgv.0.001453.
- 595 24. Sofia, M. J. Enter Sofosbuvir: The Path to Curing HCV. *Cell* **167**, 25–29 (2016).
- 596 25. Sheahan, T. P. *et al.* An orally bioavailable broad-spectrum antiviral inhibits SARS-CoV-2 in  
597 human airway epithelial cell cultures and multiple coronaviruses in mice. *Sci Transl Med* **12**, (2020).
- 598 26. Sumpter, R., Wang, C., Foy, E., Loo, Y.-M. & Gale, M. *Viral evolution and interferon*  
599 *resistance of hepatitis C virus RNA replication in a cell culture model. Journal of Virology* vol. 78  
600 (2004).
- 601 27. Tang, B. S. F. *et al.* Comparative host gene transcription by microarray analysis early after  
602 infection of the Huh7 cell line by severe acute respiratory syndrome coronavirus and human  
603 coronavirus 229E. *J Virol* **79**, 6180–6193 (2005).
- 604 28. Felgenhauer, U. *et al.* Inhibition of SARS-CoV-2 by type I and type III interferons. *J Biol Chem*  
605 (2020) doi:10.1074/jbc.AC120.013788.



- 606 29. Emeny, J. M. & Morgan, M. J. Regulation of the interferon system: evidence that Vero cells  
607 have a genetic defect in interferon production. *J Gen Virol* **43**, 247–252 (1979).
- 608 30. Shajahan, A., Supekar, N. T., Gleinich, A. S. & Azadi, P. Deducing the N- and O- glycosylation  
609 profile of the spike protein of novel coronavirus SARS-CoV-2. *Glycobiology* (2020)  
610 doi:10.1093/glycob/cwaa042.
- 611 31. Chen, J., Wang, R., Wang, M. & Wei, G.-W. Mutations Strengthened SARS-CoV-2 Infectivity.  
612 *J Mol Biol* (2020) doi:10.1016/j.jmb.2020.07.009.
- 613 32. Hoffmann, M. *et al.* SARS-CoV-2 Cell Entry Depends on ACE2 and TMPRSS2 and Is Blocked  
614 by a Clinically Proven Protease Inhibitor. *Cell* **181**, 271-280.e8 (2020).
- 615 33. Hoffmann, M., Kleine-Weber, H. & Pöhlmann, S. A Multibasic Cleavage Site in the Spike  
616 Protein of SARS-CoV-2 Is Essential for Infection of Human Lung Cells. *Mol Cell* **78**, 779-784.e5  
617 (2020).
- 618 34. Belouzard, S., Chu, V. C. & Whittaker, G. R. Activation of the SARS coronavirus spike protein  
619 via sequential proteolytic cleavage at two distinct sites. *Proc Natl Acad Sci U S A* **106**, 5871–5876  
620 (2009).
- 621 35. Watanabe, R. *et al.* Entry from the cell surface of severe acute respiratory syndrome  
622 coronavirus with cleaved S protein as revealed by pseudotype virus bearing cleaved S protein. *J Virol*  
623 **82**, 11985–11991 (2008).
- 624 36. Yamada, Y. & Liu, D. X. Proteolytic activation of the spike protein at a novel RRRR/S motif is  
625 implicated in furin-dependent entry, syncytium formation, and infectivity of coronavirus infectious  
626 bronchitis virus in cultured cells. *J Virol* **83**, 8744–8758 (2009).
- 627 37. Klimstra, W. B. *et al.* SARS-CoV-2 growth, furin-cleavage-site adaptation and neutralization  
628 using serum from acutely infected hospitalized COVID-19 patients. *J Gen Virol* (2020)  
629 doi:10.1099/jgv.0.001481.
- 630 38. Liu, S. *et al.* Interaction between heptad repeat 1 and 2 regions in spike protein of SARS-  
631 associated coronavirus: implications for virus fusogenic mechanism and identification of fusion  
632 inhibitors. *Lancet* **363**, 938–947 (2004).
- 633 39. Nie, Y. *et al.* Highly infectious SARS-CoV pseudotyped virus reveals the cell tropism and its  
634 correlation with receptor expression. *Biochem Biophys Res Commun* **321**, 994–1000 (2004).
- 635 40. Hamming, I. *et al.* Tissue distribution of ACE2 protein, the functional receptor for SARS  
636 coronavirus. A first step in understanding SARS pathogenesis. *J Pathol* **203**, 631–637 (2004).

637 41. Ma, D. *et al.* Expression of SARS-CoV-2 receptor ACE2 and TMPRSS2 in human primary  
638 conjunctival and pterygium cell lines and in mouse cornea. *Eye (Lond)* **34**, 1212–1219 (2020).

639 42. Zmora, P., Moldenhauer, A.-S., Hofmann-Winkler, H. & Pöhlmann, S. TMPRSS2 Isoform 1  
640 Activates Respiratory Viruses and Is Expressed in Viral Target Cells. *PLoS One* **10**, e0138380 (2015).

641 43. Esumi, M. *et al.* Transmembrane serine protease TMPRSS2 activates hepatitis C virus  
642 infection. *Hepatology* **61**, 437–446 (2015).

643 44. Yan, V. C. & Muller, F. L. Advantages of the Parent Nucleoside GS-441524 over Remdesivir  
644 for Covid-19 Treatment. *ACS Med Chem Lett* **11**, 1361–1366 (2020).

645 45. Li, Y. P. *et al.* Highly efficient full-length hepatitis C virus genotype 1 (strain TN) infectious  
646 culture system. *Proc.Natl.Acad.Sci.U.S.A* **109**, 19757–19762 (2012).

647 46. Ramirez, S., Mikkelsen, L. S., Gottwein, J. M. & Bukh, J. Robust HCV Genotype 3a Infectious  
648 Cell Culture System Permits Identification of Escape Variants With Resistance to Sofosbuvir.  
649 *Gastroenterology* **151**, 973–985 (2016).

650 47. Ramirez, S. *et al.* Highly efficient infectious cell culture of three hepatitis C virus genotype 2b  
651 strains and sensitivity to lead protease, nonstructural protein 5A, and polymerase inhibitors.  
652 *Hepatology* **59**, 395–407 (2014).

653 48. Ramirez, S. *et al.* Cell Culture Studies of the Efficacy and Barrier to Resistance of Sofosbuvir-  
654 Velpatasvir and Glecaprevir-Pibrentasvir against Hepatitis C Virus Genotypes 2a, 2b, and 2c.  
655 *Antimicrob Agents Chemother* **64**, (2020).

656 49. Toots, M. *et al.* Characterization of orally efficacious influenza drug with high resistance barrier  
657 in ferrets and human airway epithelia. *Sci Transl Med* **11**, (2019).

658 50. Jácome, R., Campillo-Balderas, J. A., Ponce de León, S., Becerra, A. & Lazcano, A. Sofosbuvir  
659 as a potential alternative to treat the SARS-CoV-2 epidemic. *Sci Rep* **10**, 9294 (2020).

660 51. Chien, M. *et al.* Nucleotide Analogues as Inhibitors of SARS-CoV-2 Polymerase, a Key Drug  
661 Target for COVID-19. *J Proteome Res* (2020) doi:10.1021/acs.jproteome.0c00392.

662 52. Shannon, A. *et al.* Remdesivir and SARS-CoV-2: Structural requirements at both nsp12 RdRp  
663 and nsp14 Exonuclease active-sites. *Antiviral Res* **178**, 104793 (2020).

664 53. Takahashi, H. *et al.* Case studies of SARS-CoV-2 treated with favipiravir among patients in  
665 critical or severe condition. *Int J Infect Dis* (2020) doi:10.1016/j.ijid.2020.08.047.

666 54. Bekerman, E. & Einav, S. Infectious disease. Combating emerging viral threats. *Science* **348**,  
667 282–283 (2015).

- 668 55. Corman, V. M. *et al.* Detection of 2019 novel coronavirus (2019-nCoV) by real-time RT-PCR.  
669 *Euro Surveill* **25**, (2020).
- 670 56. Fields, B. N., Knipe, D. M. & Howley, P. M. *Fields virology*. (Wolters Kluwer  
671 Health/Lippincott Williams & Wilkins, 2007).
- 672 57. Fahnoe, U. & Bukh, J. Full-Length Open Reading Frame Amplification of Hepatitis C Virus.  
673 *Methods Mol.Biol.* **1911**, 85–91 (2019).
- 674 58. Li, Y. P., Gottwein, J. M., Scheel, T. K., Jensen, T. B. & Bukh, J. MicroRNA-122 antagonism  
675 against hepatitis C virus genotypes 1-6 and reduced efficacy by host RNA insertion or mutations in the  
676 HCV 5' UTR. *Proc.Natl.Acad.Sci.U.S.A* **108**, 4991–4996 (2011).
- 677 59. Jensen, S. B. *et al.* Evolutionary Pathways to Persistence of Highly Fit and Resistant Hepatitis  
678 C Virus Protease Inhibitor Escape Variants. *Hepatology* (2019).
- 679 60. Martin, M. Cutadapt removes adapter sequences from high-throughput sequencing reads.  
680 *EMBnet.journal; Vol 17, No 1: Next Generation Sequencing Data Analysis* DO - 10.14806/ej.17.1.200  
681 (2011).
- 682 61. Gottwein, J. M. *et al.* Novel infectious cDNA clones of hepatitis C virus genotype 3a (strain  
683 S52) and 4a (strain ED43): genetic analyses and in vivo pathogenesis studies. *J.Virol.* **84**, 5277–5293  
684 (2010).
- 685 62. Gottwein, J. M., Scheel, T. K., Jensen, T. B., Ghanem, L. & Bukh, J. Differential efficacy of  
686 protease inhibitors against HCV genotypes 2a, 3a, 5a, and 6a NS3/4A protease recombinant viruses.  
687 *Gastroenterology* **141**, 1067–1079 (2011).
- 688 63. Edgar, R. C. MUSCLE: multiple sequence alignment with high accuracy and high throughput.  
689 *Nucleic Acids Res* **32**, 1792–1797 (2004).
- 690 64. Yuan, Y. *et al.* Cryo-EM structures of MERS-CoV and SARS-CoV spike glycoproteins reveal  
691 the dynamic receptor binding domains. *Nat Commun* **8**, 15092 (2017).
- 692 65. Park, Y.-J. *et al.* Structures of MERS-CoV spike glycoprotein in complex with sialoside  
693 attachment receptors. *Nat Struct Mol Biol* **26**, 1151–1157 (2019).
- 694 66. Bangaru S., Turner H.L., Ozorowski G., Antanasijevic A., Ward A.B. Structure of SARS-CoV-  
695 2 3Q-2P full-length prefusion spike trimer (C3 symmetry). PDB ID: 7JJI.
- 696 67. Schrödinger LLC. The PyMOL Molecular Graphics System, Version 2.3.
- 697 68. Fiser, A. & Sali, A. ModLoop: automated modeling of loops in protein structures.  
698 *Bioinformatics* **19**, 2500–2501 (2003).

- 699 69. Gui, M. *et al.* Cryo-electron microscopy structures of the SARS-CoV spike glycoprotein reveal  
700 a prerequisite conformational state for receptor binding. *Cell Res* **27**, 119–129 (2017).
- 701 70. Zhang, W.-F., Stephen, P., Thériault, J.-F., Wang, R. & Lin, S.-X. Novel Coronavirus  
702 Polymerase and Nucleotidyl-Transferase Structures: Potential to Target New Outbreaks. *J Phys Chem*  
703 *Lett* **11**, 4430–4435 (2020).
- 704

**Figure 1a**

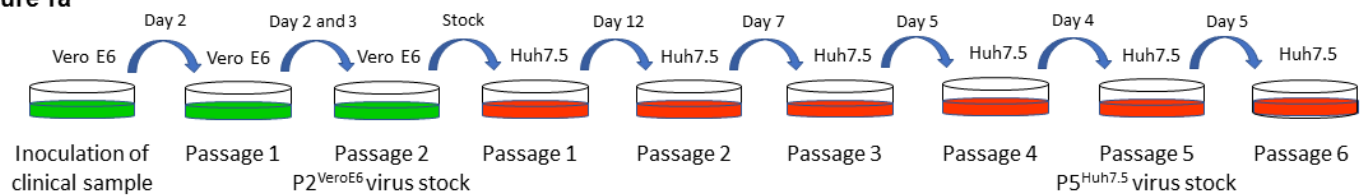

**Figure 1b**

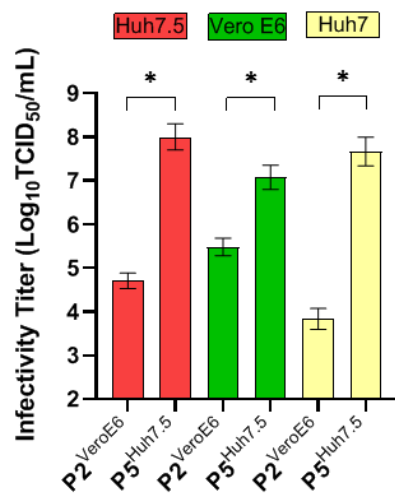

**Figure 1c**

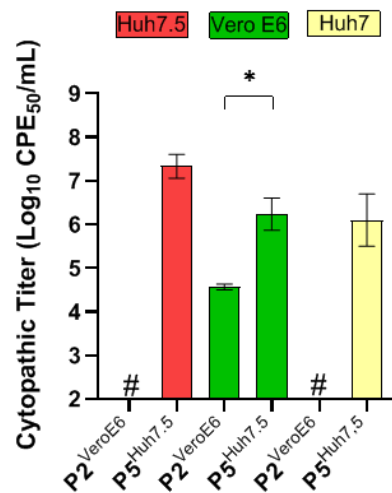

**Figure 1d**

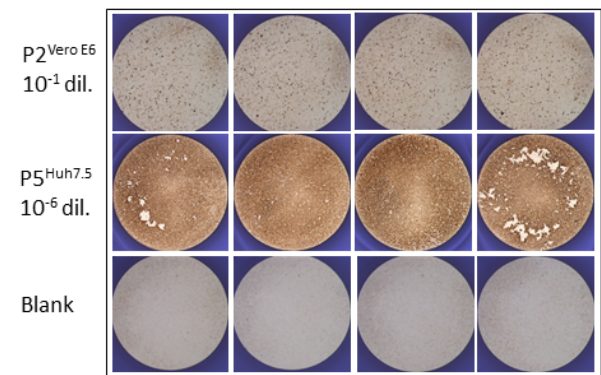

**Figure 2a**

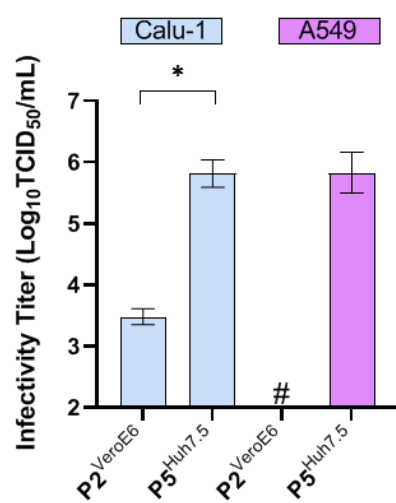

**Figure 2b**

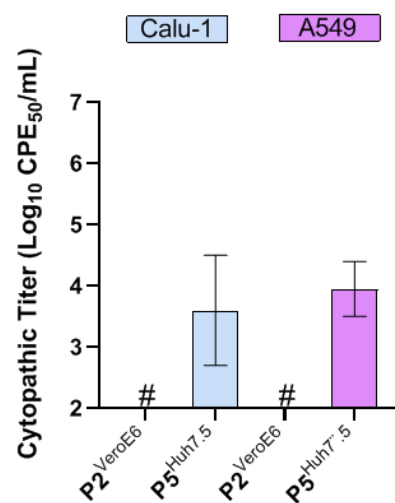

**Figure 2c**

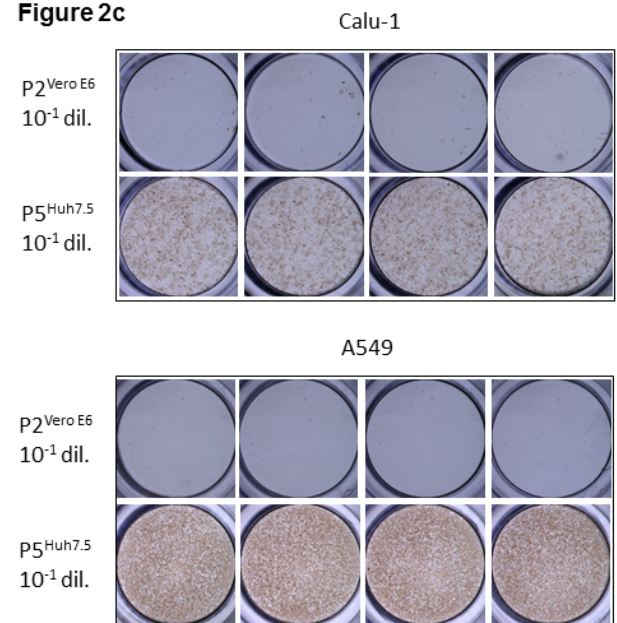

Figure 3a

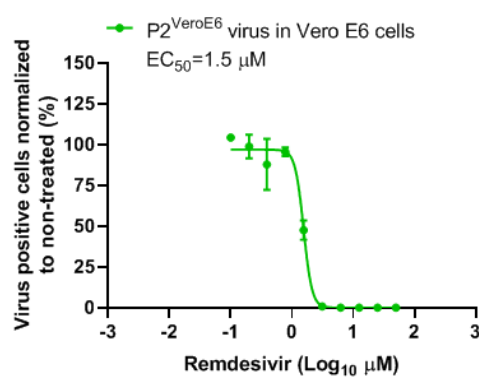

Figure 3b

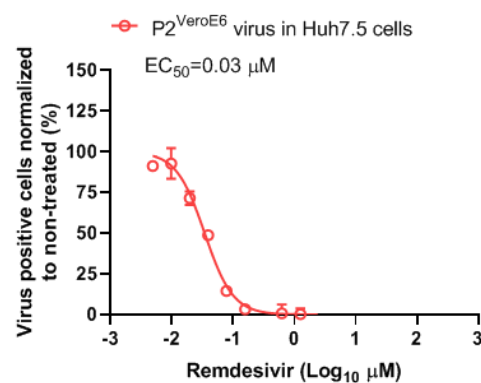

Figure 3c

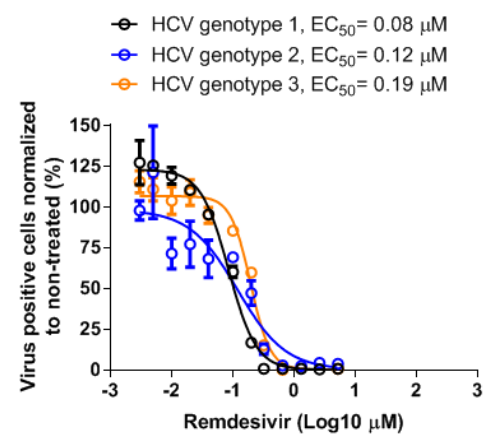

Figure 4a

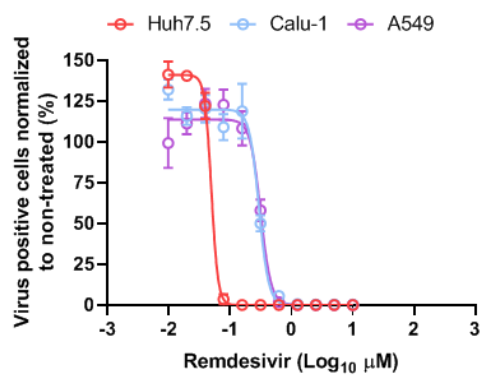

Figure 4b

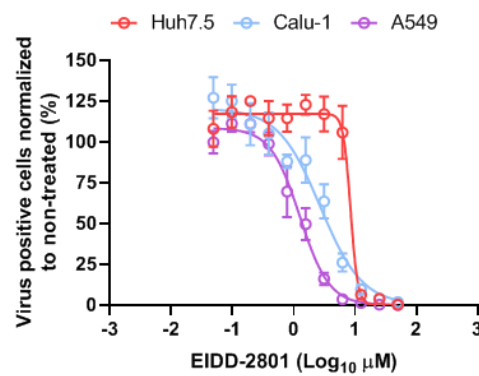

Figure 4c

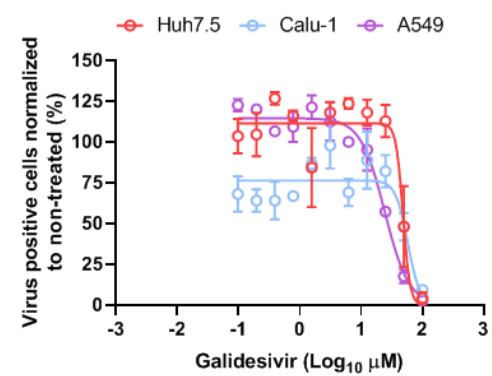



Figure 5a

|                      |    |                                       |              |     |
|----------------------|----|---------------------------------------|--------------|-----|
| SARS-CoV-2           | 59 | FSNVTWFHAIHVSGTNGTKRF----             | DNPVLPFNDGV  | 90  |
| P2 <sup>VeroE6</sup> | 59 | FSNVTWFHAIHVSGTNGTKRF----             | DNPVLPFNDGV  | 90  |
| P5 <sup>Huh7.5</sup> | 59 | FSNVTWFHA-----KRF----                 | DNPVLPFNDGV  | 90  |
| SARS-CoV             | 63 | YSNVTGFHTIN-----HTF----               | GNPVI PFKDGI | 87  |
| MERS-CoV             | 81 | HGDMYVYSAGHATGTTTPQKLFVANYSQDVKQFANGF |              | 116 |

Figure 5b

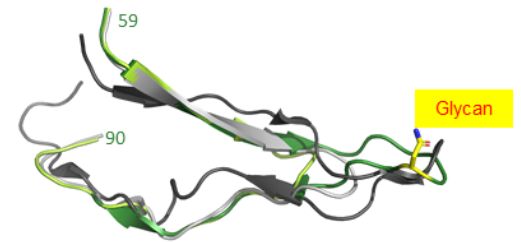

Figure 5c

|                      |     |                                   |     |
|----------------------|-----|-----------------------------------|-----|
| SARS-CoV-2           | 805 | ILPDPS-----KPSKRSFIEDLLFNKVTIADAG | 823 |
| P2 <sup>VeroE6</sup> | 805 | ILPDPS-----KPSKRSFIEDLLFNKVTIADAG | 823 |
| P5 <sup>Huh7.5</sup> | 805 | ILPDPS-----KPSKRSFIEDLLFNKVTIADAG | 823 |
| SARS-CoV             | 787 | ILPDPL-----KPTKRSFIEDLLFNKVTIADAG | 814 |
| MERS-CoV             | 872 | TLLEPVSIISTGSRSAIAIEDLLFDKVTIADPG | 904 |

S2'  
fusion peptide

Figure 5d

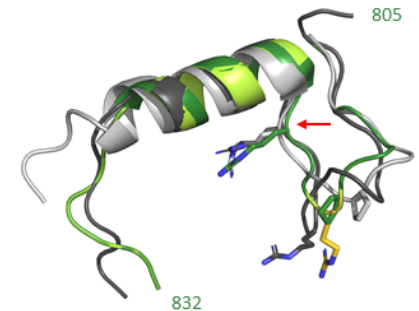

Source: https://www.biorxiv.org/content/biorxiv/early/2020/10/04/2020.10.04.325316.full.pdf
